# Supplementary material
Source: PubMed Central journal article supplement (PMC2908589)
Supplement: NIHMS215083-supplement-1_si_001.pdf [file NIHMS215083-supplement-1_si_001.pdf]

# Supporting Information:

## Origins of Stereoselectivity in the *trans*-Diels-Alder Paradigm

Robert S. Paton,<sup>1</sup> Joel L. Mackey,<sup>1</sup> Woo Han Kim,<sup>2</sup> Jun Hee Lee,<sup>3</sup> Samuel J. Danishefsky<sup>2,3</sup> and K. N. Houk\*<sup>1</sup>

<sup>1</sup> Department of Chemistry and Biochemistry, University of California, Los Angeles, 607 Charles E. Young Drive, Los Angeles, California 90095-1569

<sup>2</sup> Laboratory for Bioorganic Chemistry, Sloan-Kettering Institute for Cancer Research, 1275 York Avenue, New York, New York 10065

<sup>3</sup> Department of Chemistry, Columbia University, Havemeyer Hall, 3000 Broadway, New York, New York 10027

### Contents:

|                                                                                           |              |
|-------------------------------------------------------------------------------------------|--------------|
| <b>Full Reference 25</b>                                                                  | <b>p. S1</b> |
| <b>Figure S1. Energetics for Figure 1 (main text) with different theoretical methods.</b> | <b>p. S2</b> |
| <b>Figure S2. Regioisomeric hetero-Diels-Alder TSs for Figure 1.</b>                      | <b>p. S3</b> |
| <b>Figure S3. Exo TSs for Figure 3.</b>                                                   | <b>p. S3</b> |
| <b>Figure S4. Summary of results for radical hydrodenitration of different substrates</b> | <b>p. S3</b> |
| <b>Cartesian Coordinates</b>                                                              | <b>p. S6</b> |

### Full reference 25:

Gaussian 09, Revision A.02,

M. J. Frisch, G. W. Trucks, H. B. Schlegel, G. E. Scuseria, M. A. Robb, J. R. Cheeseman, G. Scalmani, V. Barone, B. Mennucci, G. A. Petersson, H. Nakatsuji, M. Caricato, X. Li, H. P. Hratchian, A. F. Izmaylov, J. Bloino, G. Zheng, J. L. Sonnenberg, M. Hada, M. Ehara, K. Toyota, R. Fukuda, J. Hasegawa, M. Ishida, T. Nakajima, Y. Honda, O. Kitao, H. Nakai, T. Vreven, J. A. Montgomery, Jr., J. E. Peralta, F. Ogliaro, M. Bearpark, J. J. Heyd, E. Brothers, K. N. Kudin, V. N. Staroverov, R. Kobayashi, J. Normand, K. Raghavachari, A. Rendell, J. C. Burant, S. S. Iyengar, J. Tomasi, M. Cossi, N. Rega, J. M. Millam, M. Klene, J. E. Knox, J. B. Cross, V. Bakken, C. Adamo, J. Jaramillo, R. Gomperts, R. E. Stratmann, O. Yazyev, A. J. Austin, R. Cammi, C. Pomelli, J. W. Ochterski, R. L. Martin, K. Morokuma, V. G. Zakrzewski, G. A. Voth, P. Salvador, J. J. Dannenberg, S. Dapprich, A. D. Daniels, O. Farkas, J. B. Foresman, J. V. Ortiz, J. Cioslowski, and D. J. Fox, Gaussian, Inc., Wallingford CT, 2009.

**Figure S1. Computed free energies for the reaction of nitrocyclohexene and 2,3-dimethylbutadiene. Optimizations performed with B3LYP/6-31G(d), single point energies performed with B3LYP and M06-2X density functionals and the B2-PLYP double-hybrid functional, with 6-31G(d) and 6-311+G(d,p) basis sets and with continuum solvation in trifluoroethanol.**

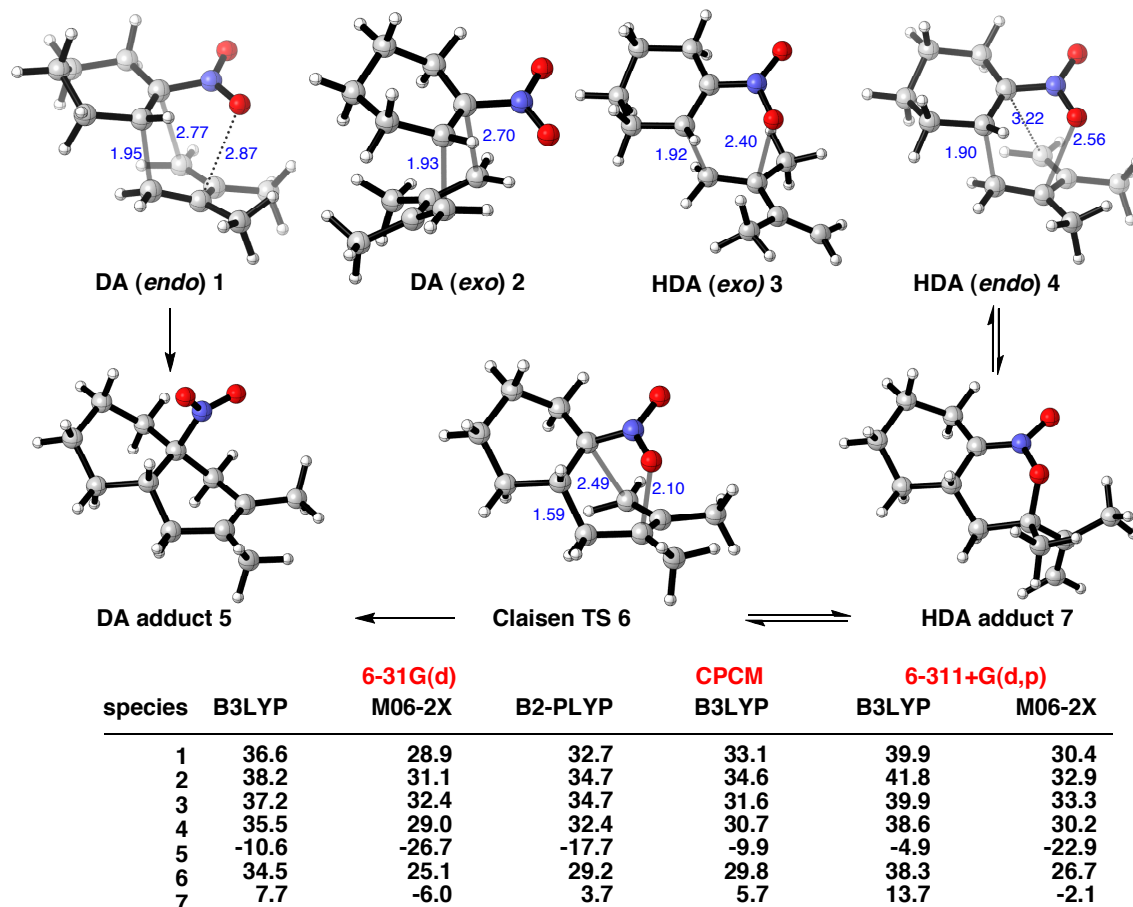

For all density functionals, basis sets and with and without solvation, the lowest energy transition structure is the hetero-Claisen TS (TS 6). Of the cycloaddition TSs, the HDA pathway via TS 4 is the lowest in energy at all computed levels, bar M06-2X/6-31G(d) where TS 1 and TS 4 are separated by 0.1 kcal/mol.

**Figure S2.** Regioisomeric hetero-Diels Alder transition structures for the cycloaddition of 2,3-dimethylbutadiene and nitrocyclohexene. Selected distances shown in Å, B3LYP/6-31G(d) activation free energies, shown in kcal/mol.

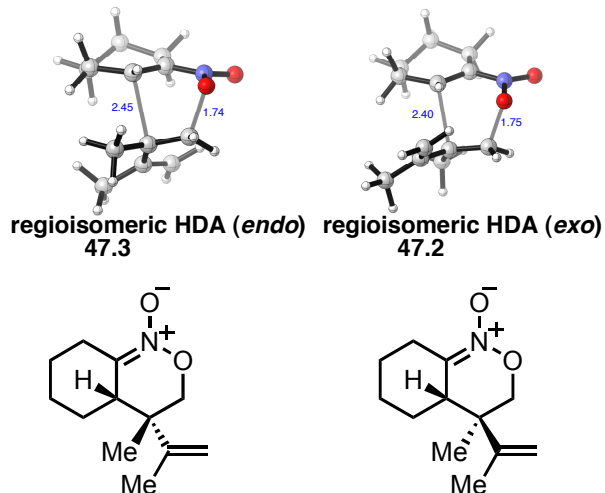

These structures lie around 10 kcal/mol higher in energy than the other transition structures considered, so can be regarded as uncompetitive.

**Figure S3.** *Exo* Diels-Alder and hetero-Diels Alder transition structures for the cycloaddition of 2-methylbutadiene and nitrocyclohexene. Selected distances shown in Å, B3LYP/6-31G(d) activation free energies, with M06-2X/6-31G(d) values in parentheses, shown in kcal/mol.

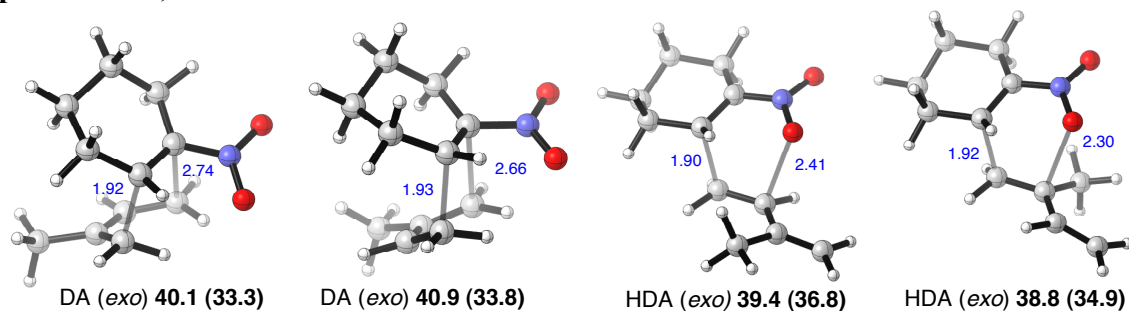

**Figure S4.** Computed radical hydrogenation of three 6,6-bicyclic cycloadducts and two 5,6-bicyclic cycloadduct. UB3LYP/6-31G(d) relative free energies in kcal/mol tabulated.

| system                                                                            |                                     | <i>cis</i> : <i>trans</i> | computed $\Delta\Delta G^\ddagger$ |
|-----------------------------------------------------------------------------------|-------------------------------------|---------------------------|------------------------------------|
| 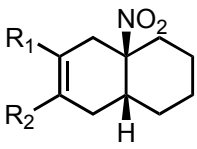 | $R_1 = R_2 = \text{Me}$             | 1 : 8                     | 2.5                                |
|                                                                                   | $R_1 = R_2 = \text{Ph}$             | 1 : 7                     | 1.4                                |
|                                                                                   | $R_1 = \text{H}, R_2 = \text{Me}$   | 1 : 8                     | 2.0                                |
|  | $R_1 = R_2 = \text{Me}$             | 1 : 1.3                   | 0.0                                |
|                                                                                   | $R_1 = \text{H}, R_2 = \text{OTBS}$ | 1 : 1.4                   | 0.7                                |

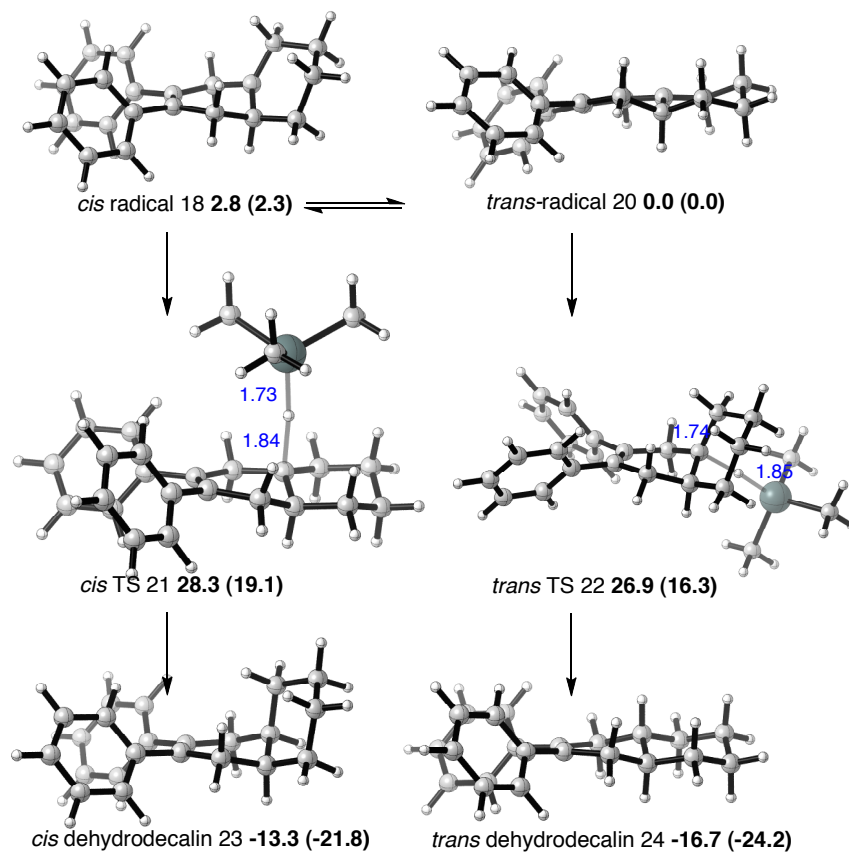

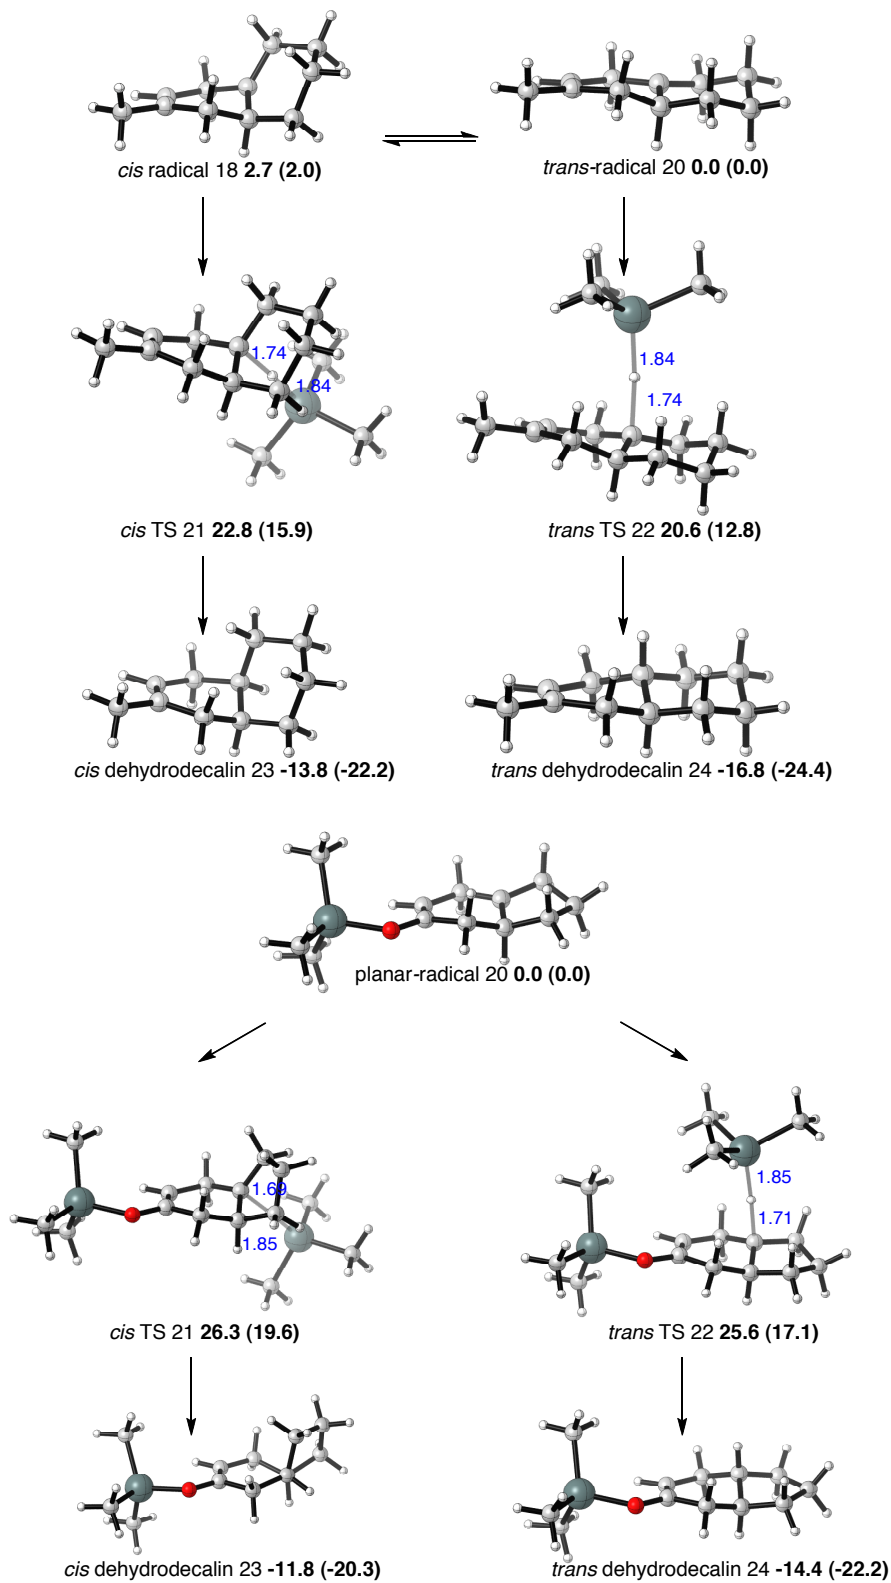

**Bicyclic radicals and hydrogen transfer TSs and bicyclic products in the cycloaddition of a) 2,3-diphenyl-1,3-butadiene and 1-nitrocyclohexene; b) 2-methyl-1,3-butadiene and 1-nitrocyclohexene; c) 2-OTBS-1,3-butadiene and 1-**

nitrocyclopentene. Selected distances shown in Å, UB3LYP/LANL2DZ relative free energies, UM06-2X/LANL2DZ in parentheses, in kcal/mol.

**Cartesian Coordinates of B3LYP/6-31G(d) stationary points. B3LYP/6-31G(d) and M06-2X/6-31G(d) energetics.**

**1:**

| <b>E(B3LYP)</b> | <b>H(B3LYP)</b> | <b>G(B3LYP)</b> | <b>E(M06-2X)</b> |
|-----------------|-----------------|-----------------|------------------|
| -673.743019     | -673.43242      | -673.490675     | -673.430579      |

|   |           |           |           |
|---|-----------|-----------|-----------|
| C | -0.866089 | -0.852788 | -0.627996 |
| C | -0.866948 | 0.522392  | -0.2858   |
| C | 1.962218  | 0.020926  | 0.997319  |
| C | 0.97224   | 0.542493  | 1.781521  |
| H | 1.080057  | 1.53043   | 2.219898  |
| C | 1.741689  | -1.193342 | 0.263032  |
| C | 0.496174  | -1.846274 | 0.347312  |
| H | 0.41904   | -2.815744 | -0.142351 |
| H | -0.401217 | -1.03725  | -1.591865 |
| O | 0.990365  | 0.755563  | -1.605852 |
| O | 0.00117   | 2.570283  | -0.857193 |
| N | 0.08456   | 1.332762  | -0.954117 |
| H | -0.022636 | -1.821517 | 1.300437  |
| H | 0.106322  | -0.019844 | 2.1041    |
| C | -1.982387 | 1.253203  | 0.416405  |
| H | -1.598215 | 1.908828  | 1.204591  |
| H | -2.448601 | 1.930936  | -0.314083 |
| C | -2.146922 | -1.662831 | -0.356878 |
| H | -2.005618 | -2.324906 | 0.506773  |
| H | -2.330162 | -2.322847 | -1.212959 |
| C | -3.376908 | -0.782803 | -0.084462 |
| H | -3.703671 | -0.293297 | -1.012322 |
| H | -4.208749 | -1.41385  | 0.251494  |
| C | -3.042799 | 0.28637   | 0.960917  |
| H | -2.681565 | -0.202372 | 1.877845  |
| H | -3.93816  | 0.852296  | 1.242864  |
| C | 3.223477  | 0.819778  | 0.752128  |
| H | 3.242653  | 1.192954  | -0.278224 |
| H | 3.281216  | 1.678926  | 1.425918  |
| H | 4.12296   | 0.211637  | 0.905424  |
| C | 2.782482  | -1.692274 | -0.704694 |
| H | 3.075945  | -0.917991 | -1.420352 |
| H | 3.691524  | -2.004362 | -0.171273 |
| H | 2.41732   | -2.557223 | -1.265564 |

**2:**

| <b>E(B3LYP)</b> | <b>H(B3LYP)</b> | <b>G(B3LYP)</b> | <b>E(M06-2X)</b> |
|-----------------|-----------------|-----------------|------------------|
| -673.740598     | -673.430028     | -673.488132     | -673.427201      |

C 0.946925 -0.513323 -1.668467  
C -0.532439 0.607443 -1.141897  
C -1.208715 0.097399 -0.00261  
C 0.411964 -1.945086 0.696856  
H 0.106409 -2.3524 1.657004  
H 1.261566 -0.035963 -2.5955  
H -1.048907 0.364672 -2.068114  
C -0.026721 2.051745 -1.0868  
H 0.868444 2.168812 -1.707486  
H -0.800714 2.680106 -1.552361  
C -1.278287 0.804592 1.333953  
H -0.549467 0.381514 2.035851  
C 0.222813 2.570185 0.333347  
C -1.009356 2.31328 1.205653  
H 0.461972 3.640014 0.295714  
H 1.095059 2.066242 0.773841  
H -1.87929 2.811425 0.755281  
H -0.879086 2.745112 2.205103  
N -2.156458 -0.9483 -0.2452  
O -2.110868 -1.540043 -1.349111  
O -2.963596 -1.257473 0.646248  
H -2.263267 0.615288 1.767603  
C 1.593852 -1.259277 0.577952  
C 1.90879 -0.579529 -0.641521  
H -0.16959 -2.271154 -0.153797  
H 0.302209 -1.372418 -1.837721  
C 2.506692 -1.108311 1.778122  
H 3.508701 -1.503058 1.567592  
H 2.636253 -0.058517 2.071688  
H 2.112681 -1.65242 2.640839  
C 3.185724 0.216279 -0.749827  
H 3.272873 0.981356 0.033254  
H 4.062162 -0.436864 -0.638107  
H 3.265454 0.714101 -1.719935

**3:**

| <b>E(B3LYP)</b> | <b>H(B3LYP)</b> | <b>G(B3LYP)</b> | <b>E(M06-2X)</b> |
|-----------------|-----------------|-----------------|------------------|
| -673.741938     | -673.4318       | -673.489742     | -673.424741      |

C -0.527806 -1.159938 0.743701  
C 0.815244 -0.779207 -0.57126

C 1.260349 0.556228 -0.428773  
 C -1.603622 -0.238483 0.736342  
 H 0.098812 -1.135147 1.634165  
 H -0.753004 -2.171415 0.4154  
 H 0.137046 -0.928572 -1.406242  
 C 1.867575 -1.872014 -0.40692  
 H 1.392722 -2.818216 -0.122623  
 H 2.317049 -2.04397 -1.39606  
 C 2.543796 0.977704 0.227669  
 H 2.345939 1.29366 1.265985  
 C 2.976043 -1.497731 0.586181  
 C 3.59399 -0.144632 0.212862  
 H 3.741603 -2.282865 0.595476  
 H 2.566447 -1.449211 1.605842  
 H 4.032491 -0.2201 -0.791812  
 H 4.41331 0.109097 0.895374  
 N 0.331667 1.546698 -0.699544  
 O -0.833107 1.159924 -1.0544  
 O 0.607578 2.752814 -0.514673  
 H 2.918012 1.876305 -0.273158  
 C -2.850528 -0.527115 0.0198  
 C -4.008367 0.064642 0.375614  
 H -4.936129 -0.171583 -0.137135  
 H -4.076605 0.785981 1.18228  
 C -1.535432 0.921006 1.6943  
 H -2.094387 1.786847 1.33673  
 H -1.929349 0.628365 2.678689  
 H -0.495487 1.228226 1.845098  
 C -2.822252 -1.517493 -1.122822  
 H -2.129527 -1.181289 -1.902145  
 H -2.506165 -2.518567 -0.803817  
 H -3.81416 -1.614135 -1.57282

4:

| <b>E(B3LYP)</b> | <b>H(B3LYP)</b> | <b>G(B3LYP)</b> | <b>E(M06-2X)</b> |
|-----------------|-----------------|-----------------|------------------|
| -673.744500     | -673.434186     | -673.492458     | -673.430140      |

C -0.364589 -1.736082 0.307933  
 C 0.941931 -0.813159 -0.715487  
 C 0.953585 0.574187 -0.419884  
 C -1.215532 0.479801 1.965246  
 C -2.0392 -0.015998 1.010312  
 C -1.639652 -1.139366 0.177852  
 H 0.12504 -1.684003 1.276769  
 H -0.276272 0.017626 2.243124



H -1.485583 1.374125 2.518631  
 H -0.267914 -2.719569 -0.148794  
 H 0.470602 -1.038841 -1.668973  
 C 2.243852 -1.576252 -0.463132  
 H 2.036436 -2.636329 -0.276505  
 H 2.826386 -1.541498 -1.395371  
 C 2.007111 1.295888 0.378736  
 H 1.659507 1.480503 1.40542  
 C 3.08935 -0.979665 0.669325  
 C 3.330551 0.513491 0.419667  
 H 4.04121 -1.519849 0.739998  
 H 2.58033 -1.117189 1.634971  
 H 3.856336 0.63146 -0.537989  
 H 3.983504 0.93711 1.191651  
 N -0.106146 1.323718 -0.933141  
 O -1.025972 0.676986 -1.524172  
 O -0.150523 2.560679 -0.77837  
 H 2.149878 2.288619 -0.059665  
 C -2.60438 -1.710774 -0.825325  
 H -3.389335 -2.289029 -0.314846  
 H -3.098265 -0.933475 -1.41298  
 H -2.094768 -2.390374 -1.514471  
 C -3.352834 0.674892 0.720101  
 H -3.311851 1.145471 -0.268713  
 H -4.195659 -0.026369 0.726796  
 H -3.555759 1.452485 1.461201

**5:**

| <b>E(B3LYP)</b> | <b>H(B3LYP)</b> | <b>G(B3LYP)</b> | <b>E(M06-2X)</b> |
|-----------------|-----------------|-----------------|------------------|
| -673.825819     | -673.511642     | -673.565803     | -673.526751      |

C -0.780165 1.840076 -0.051749  
 C 0.527579 1.063371 0.244384  
 C 0.498219 -0.372455 -0.354905  
 C -0.71526 -0.578017 -1.277716  
 C -2.011168 -0.20217 -0.58055  
 C -2.033873 0.990057 0.042669  
 H -0.710834 2.27263 -1.063877  
 H -0.548686 0.063624 -2.156755  
 H -0.736171 -1.608973 -1.636344  
 H -0.839654 2.694506 0.632673  
 H 0.610738 0.948009 1.328217  
 C 1.762818 1.847506 -0.231131  
 H 1.700396 2.007296 -1.31724  
 H 1.742771 2.847846 0.219158

C 1.823022 -0.75477 -1.055136  
 H 1.82594 -0.242052 -2.024938  
 C 3.081975 1.142899 0.125544  
 C 3.071598 -0.366076 -0.251461  
 H 3.260858 1.247099 1.202132  
 H 3.910134 1.658105 -0.375052  
 H 3.115026 -0.976582 0.656248  
 H 3.960711 -0.625101 -0.837297  
 N 0.364543 -1.417805 0.804029  
 O 0.808135 -1.133668 1.913009  
 O -0.109957 -2.51378 0.516499  
 H 1.813123 -1.828791 -1.271864  
 C -3.191746 1.580013 0.803182  
 H -2.909952 1.780724 1.846335  
 H -3.489424 2.546048 0.371335  
 H -4.073933 0.936074 0.814561  
 C -3.123918 -1.212887 -0.649252  
 H -2.798443 -2.16398 -0.208124  
 H -4.031473 -0.891295 -0.133155  
 H -3.392828 -1.426263 -1.693545

**6:**

**E(B3LYP)**  
-673.750191

**H(B3LYP)**  
-673.438752

**G(B3LYP)**  
-673.494

**E(M06-2X)**  
-673.440494

C 0.453744 1.780939 0.115906  
 C -0.861776 0.987891 -0.289345  
 C -0.782577 -0.49203 -0.067586  
 C 0.902482 -0.403616 1.768508  
 C 1.951543 -0.05399 0.948322  
 C 1.718562 0.979839 -0.000092  
 H 0.334295 2.128691 1.149112  
 H 0.144582 0.300456 2.084956  
 H 0.930827 -1.335101 2.328298  
 H 0.512431 2.675586 -0.511261  
 H -0.952711 1.155278 -1.37103  
 C -2.106468 1.543315 0.419106  
 H -1.978518 1.427435 1.505145  
 H -2.190828 2.621909 0.237546  
 C -1.95014 -1.232209 0.517475  
 H -1.997055 -1.088467 1.606144  
 C -3.402409 0.832239 -0.025092  
 C -3.259031 -0.715021 -0.12062  
 H -3.710917 1.229037 -1.000078  
 H -4.201941 1.098673 0.676297

H -3.26808 -1.022637 -1.172722  
H -4.11579 -1.208965 0.352499  
N 0.125134 -1.143938 -0.846502  
O 0.977926 -0.353736 -1.437702  
O 0.266989 -2.387481 -0.890833  
H -1.814977 -2.301044 0.337529  
C 2.802385 1.519553 -0.886914  
H 3.262649 2.401747 -0.418281  
H 3.588258 0.787445 -1.079355  
H 2.381734 1.836793 -1.846066  
C 3.166898 -0.94956 0.83108  
H 4.09568 -0.39644 1.018135  
H 3.116461 -1.763036 1.560118  
H 3.229363 -1.39416 -0.167669

7:

**E(B3LYP)**  
-673.793074

**H(B3LYP)**  
-673.479692

**G(B3LYP)**  
-673.536681

**E(M06-2X)**  
-673.490112

C -0.316185 -1.422596 0.218849  
C 1.036025 -0.889226 -0.295249  
C 1.084084 0.592505 -0.03155  
C -2.824309 -0.852114 1.733061  
C -2.536349 -0.13698 0.640056  
C -1.493459 -0.605044 -0.382246  
H -0.315885 -1.339966 1.309537  
H -2.310794 -1.773587 1.992552  
H -3.612021 -0.539775 2.413499  
H -0.425545 -2.485203 -0.028314  
H 1.093702 -1.069543 -1.380863  
C 2.243307 -1.556974 0.381888  
H 2.123622 -1.486417 1.47188  
H 2.256967 -2.626966 0.142025  
C 2.259728 1.22517 0.647687  
H 2.210197 1.037586 1.731601  
C 3.573522 -0.907432 -0.041164  
C 3.573667 0.64764 0.077215  
H 3.786451 -1.191035 -1.079366  
H 4.383273 -1.335125 0.560919  
H 3.739219 1.088283 -0.912343  
H 4.406298 0.983581 0.705012  
N 0.042587 1.305211 -0.363083  
O -0.960177 0.556284 -1.103043  
O -0.193968 2.517245 -0.223234  
H 2.214666 2.309621 0.517795

C -2.180286 -1.386775 -1.513946  
H -2.659843 -2.28149 -1.105733  
H -2.942332 -0.775001 -2.004931  
H -1.443504 -1.687217 -2.266592  
C -3.279876 1.13433 0.306759  
H -4.063512 1.326446 1.045748  
H -2.596442 1.988829 0.274994  
H -3.748686 1.077247 -0.683787

**8:**

**E(B3LYP)**

-634.425691

**H(B3LYP)**

-634.144866

**G(B3LYP)**

-634.20025

**E(M06-2X)**

-634.132289

C -0.463227 -0.795564 -0.683158  
C -0.657318 0.527664 -0.22716  
C 2.067983 0.234625 1.250159  
C 0.982094 0.595814 1.989038  
H 0.951863 1.555952 2.495018  
C 2.100987 -0.904361 0.395149  
C 0.971288 -1.734664 0.314074  
H 1.052583 -2.6394 -0.286565  
H 0.101861 -0.839043 -1.609734  
O 1.247054 1.106867 -1.366581  
O -0.030291 2.709615 -0.576302  
N 0.228909 1.506847 -0.755396  
H 0.383488 -1.875112 1.215721  
H 0.164017 -0.080433 2.205458  
C -1.909518 1.05499 0.426504  
H -1.675358 1.687546 1.288629  
H -2.402755 1.725988 -0.292135  
C -1.641052 -1.778978 -0.58198  
H -1.475555 -2.495409 0.232599  
H -1.676711 -2.375707 -1.501102  
C -2.991111 -1.085638 -0.339589  
H -3.31483 -0.5623 -1.249855  
H -3.754376 -1.841945 -0.119903  
C -2.872819 -0.077426 0.807857  
H -2.518222 -0.594684 1.711614  
H -3.851377 0.348645 1.057302  
C 3.262303 -1.118063 -0.538064  
H 2.911065 -1.198788 -1.573952  
H 3.976385 -0.291395 -0.494077  
H 3.795944 -2.047883 -0.299728  
H 2.897851 0.933781 1.174568

**9:**

| <b>E(B3LYP)</b> | <b>H(B3LYP)</b> | <b>G(B3LYP)</b> | <b>E(M06-2X)</b> |
|-----------------|-----------------|-----------------|------------------|
| -634.424713     | -634.143831     | -634.199301     | -634.131564      |

C -0.797992 -1.657516 0.280624  
C 0.528547 -0.771296 -0.75707  
C 0.713272 0.575326 -0.354124  
C -1.241004 0.574411 2.145321  
C -2.167801 0.169629 1.247734  
C -1.995393 -0.910492 0.313967  
H -0.239642 -1.752301 1.209101  
H -0.321312 0.030931 2.329571  
H -1.399502 1.465727 2.744081  
H -0.843985 -2.593711 -0.273609  
H -3.080167 0.753499 1.14612  
H -0.032525 -0.859819 -1.684682  
C 1.753435 -1.685104 -0.673519  
H 1.445571 -2.729897 -0.550621  
H 2.262825 -1.632093 -1.646805  
C 1.903339 1.115473 0.395806  
H 1.666318 1.253805 1.460305  
C 2.744532 -1.276932 0.423451  
C 3.130461 0.197715 0.263238  
H 3.632685 -1.918362 0.37183  
H 2.299876 -1.440033 1.41672  
H 3.588488 0.337302 -0.72581  
H 3.885607 0.486236 1.003623  
N -0.278547 1.481758 -0.75238  
O -1.302207 0.994854 -1.316817  
O -0.151735 2.700792 -0.525027  
H 2.119044 2.119017 0.016246  
C -3.106923 -1.239749 -0.642283  
H -3.757014 -0.378896 -0.816701  
H -2.707404 -1.566967 -1.608166  
H -3.72434 -2.060706 -0.248658

**10:**

| <b>E(B3LYP)</b> | <b>H(B3LYP)</b> | <b>G(B3LYP)</b> | <b>E(M06-2X)</b> |
|-----------------|-----------------|-----------------|------------------|
| -634.426914     | -634.146345     | -634.202165     | -634.131232      |

C -0.798038 -1.65753 0.280758  
C 0.528568 -0.7713 -0.756977  
C 0.713283 0.575315 -0.35403  
C -1.241322 0.574396 2.145389

C -2.167956 0.169663 1.247602  
 C -1.995442 -0.910522 0.313934  
 H -0.239715 -1.752203 1.209262  
 H -0.321774 0.030779 2.329946  
 H -1.399866 1.465755 2.744074  
 H -0.843941 -2.593754 -0.27343  
 H -0.032514 -0.85983 -1.68458  
 C 1.753445 -1.685132 -0.673438  
 H 1.445571 -2.729906 -0.550407  
 H 2.26273 -1.632231 -1.646785  
 C 1.903309 1.115395 0.396012  
 H 1.666319 1.253344 1.460571  
 C 2.744682 -1.276898 0.423389  
 C 3.130492 0.197775 0.263131  
 H 3.632859 -1.918283 0.371635  
 H 2.300179 -1.440019 1.416722  
 H 3.58827 0.337434 -0.726023  
 H 3.885782 0.486333 1.003354  
 N -0.278481 1.481792 -0.752394  
 O -1.302092 0.994934 -1.316941  
 O -0.15165 2.700815 -0.525016  
 H 2.118888 2.119075 0.016753  
 H -3.080247 0.753611 1.145755  
 C -3.10683 -1.239809 -0.642473  
 H -3.724373 -2.060698 -0.248891  
 H -3.756839 -0.378928 -0.817064  
 H -2.707164 -1.567131 -1.60826

**11:**

**E(B3LYP)**  
-634.425928

**H(B3LYP)**  
-634.145558

**G(B3LYP)**  
-634.200718

**E(M06-2X)**  
-634.126585

C -0.283 -1.86478 -0.300464  
 C 0.986138 -0.595422 -0.947637  
 C 0.763366 0.669746 -0.350502  
 C -1.774355 -0.502302 1.892863  
 C -2.307311 -0.665827 0.661677  
 C -1.596081 -1.363399 -0.393867  
 H 0.122997 -2.028677 0.695333  
 H -0.823812 -0.935221 2.1862  
 H -2.292446 0.073403 2.653893  
 H -0.043731 -2.672741 -0.988981  
 H 0.622348 -0.658783 -1.969764  
 C 2.35523 -1.231591 -0.717815  
 H 2.287901 -2.322065 -0.80851

H 3.012974 -0.900128 -1.534652  
C 1.614403 1.301351 0.716257  
H 1.130082 1.194811 1.698166  
C 2.987138 -0.832435 0.6225  
C 3.02656 0.694685 0.757548  
H 3.997311 -1.253328 0.692845  
H 2.410515 -1.263632 1.454183  
H 3.625842 1.106518 -0.066258  
H 3.525862 0.990192 1.687445  
N -0.405202 1.321158 -0.712694  
O -1.176949 0.693113 -1.516031  
O -0.707925 2.431972 -0.228623  
H 1.654234 2.380562 0.534573  
H -2.153653 -1.560393 -1.304321  
C -3.642414 -0.059007 0.298315  
H -3.483686 0.75707 -0.414931  
H -4.297119 -0.797961 -0.180508  
H -4.158258 0.335479 1.17812

**12:**

**E(B3LYP)**  
-634.508855

**H(B3LYP)**  
-634.223485

**G(B3LYP)**  
-634.276981

**E(M06-2X)**  
-634.230197

C -0.501588 2.067139 0.57934  
C 0.615262 0.988271 0.484044  
C 0.177279 -0.263531 -0.328834  
C -1.071176 0.005993 -1.187889  
C -2.20572 0.534139 -0.331861  
C -1.900466 1.506927 0.535484  
H -0.374239 2.772147 -0.259423  
H -0.777001 0.753194 -1.940694  
H -1.355149 -0.899527 -1.727934  
H -0.343746 2.658735 1.487872  
H -2.6578 1.925885 1.195401  
H 0.830845 0.636824 1.496275  
C 1.910719 1.588273 -0.090227  
H 1.726391 1.915991 -1.123614  
H 2.159802 2.498233 0.469611  
C 1.334029 -0.86123 -1.167581  
H 1.404017 -0.269378 -2.089188  
C 3.096477 0.605678 -0.050972  
C 2.674897 -0.83955 -0.424778  
H 3.539749 0.606515 0.951866  
H 3.877599 0.964533 -0.732007  
H 2.584851 -1.449021 0.480938

H 3.442131 -1.318789 -1.043181  
N -0.209274 -1.414623 0.663413  
O 0.315687 -1.44712 1.77236  
O -0.970735 -2.281011 0.240779  
H 1.061153 -1.877466 -1.472633  
C -3.56947 -0.075784 -0.488531  
H -3.536701 -1.153792 -0.284198  
H -4.296271 0.384255 0.188802  
H -3.941787 0.04112 -1.51606

**13:**

**E(B3LYP)**  
-634.430074

**H(B3LYP)**  
-634.148097

**G(B3LYP)**  
-634.200667

**E(M06-2X)**  
-634.139339

C -0.383708 -1.947449 -0.411221  
C 0.826346 -0.914961 -0.51336  
C 0.500204 0.460199 -0.015896  
C -1.240351 -0.215503 1.623513  
C -2.178818 -0.533284 0.664958  
C -1.723802 -1.290318 -0.434821  
H -0.266411 -2.510214 0.523278  
H -0.411391 -0.870086 1.860099  
H -1.433321 0.571599 2.34831  
H -0.289856 -2.665094 -1.230453  
H 1.016911 -0.837608 -1.591754  
C 2.088513 -1.427864 0.194604  
H 1.868604 -1.555114 1.264472  
H 2.349625 -2.424753 -0.181088  
C 1.504817 1.228891 0.793362  
H 1.511644 0.885144 1.837123  
C 3.288476 -0.470358 0.026217  
C 2.909947 1.031015 0.182366  
H 3.738073 -0.629506 -0.961486  
H 4.057555 -0.747273 0.756939  
H 2.924396 1.52032 -0.798552  
H 3.653309 1.551311 0.797492  
N -0.452407 1.119452 -0.736425  
O -1.126965 0.351516 -1.54728  
O -0.794228 2.309245 -0.54725  
H 1.217626 2.282766 0.801479  
H -2.42714 -1.568182 -1.213413  
C -3.500241 0.198872 0.569999  
H -4.302137 -0.479622 0.255675  
H -3.785582 0.633361 1.532556  
H -3.433806 1.005252 -0.167778



**14:**

**E(B3LYP)**

-634.476368

**H(B3LYP)**

-634.192043

**G(B3LYP)**

-634.246373

**E(M06-2X)**

-634.191019

C -0.373315 -1.556856 -0.263078  
C 0.962637 -0.840336 -0.551695  
C 0.88325 0.554077 0.015456  
C -2.975577 -1.408296 1.21793  
C -2.708703 -0.504888 0.268697  
C -1.560604 -0.675524 -0.718895  
H -0.430074 -1.738298 0.814612  
H -2.368663 -2.29329 1.383091  
H -3.842307 -1.298105 1.864335  
H -0.401833 -2.532453 -0.76161  
H 1.09669 -0.782038 -1.643604  
C 2.174874 -1.559987 0.059992  
H 1.985324 -1.727972 1.129269  
H 2.28313 -2.552734 -0.393256  
C 1.967549 1.099275 0.893802  
H 1.869864 0.684006 1.908934  
C 3.475972 -0.756525 -0.119258  
C 3.351319 0.736848 0.311442  
H 3.775767 -0.805064 -1.17345  
H 4.275591 -1.249826 0.444995  
H 3.536684 1.382593 -0.554235  
H 4.120062 0.987597 1.050659  
N -0.182207 1.262053 -0.245095  
O -1.082539 0.617296 -1.190992  
O -0.516655 2.401717 0.116647  
H 1.849258 2.181854 0.988232  
H -1.977841 -1.07456 -1.652613  
C -3.580772 0.706435 0.046695  
H -4.438274 0.69908 0.725976  
H -3.00855 1.627643 0.197551  
H -3.955596 0.739757 -0.984991

**15:**

**E(B3LYP)**

-634.508362

**H(B3LYP)**

-634.223007

**G(B3LYP)**

-634.276951

**E(M06-2X)**

-634.228954

C -1.270378 -1.558722 -0.104078  
C 0.15029 -0.967019 -0.326542  
C 0.375266 0.380744 0.414619

C -0.69318 0.63642 1.494702  
 C -2.075272 0.511567 0.904531  
 C -2.356898 -0.524404 0.104914  
 H -1.241424 -2.214314 0.781731  
 H -0.530694 -0.118423 2.280088  
 H -0.531176 1.613684 1.952296  
 H -1.512302 -2.214443 -0.9489  
 H -2.810646 1.284488 1.114663  
 H 0.257865 -0.751663 -1.392472  
 C 1.233565 -1.991612 0.055512  
 H 1.167755 -2.199442 1.133311  
 H 1.016137 -2.943335 -0.445005  
 C 1.810291 0.516119 0.976434  
 H 1.844532 -0.045936 1.918311  
 C 2.654843 -1.521401 -0.305831  
 C 2.872987 -0.017008 0.007815  
 H 2.839936 -1.701528 -1.371419  
 H 3.381568 -2.134953 0.240092  
 H 2.832867 0.567852 -0.918005  
 H 3.869566 0.149372 0.431764  
 N 0.248434 1.565867 -0.608606  
 O 0.405118 1.347524 -1.806426  
 O 0.061246 2.682294 -0.134538  
 H 1.991549 1.565115 1.233121  
 C -3.689435 -0.738617 -0.556983  
 H -3.587162 -0.765836 -1.650657  
 H -4.130762 -1.700474 -0.260328  
 H -4.400045 0.053822 -0.301189

**16:**

**E(B3LYP)**  
-634.433338

**H(B3LYP)**  
-634.151575

**G(B3LYP)**  
-634.203249

**E(M06-2X)**  
-634.142903

C -0.894455 -1.623611 -0.00127  
 C 0.481263 -0.936649 -0.383848  
 C 0.591039 0.505085 0.023212  
 C -0.930212 0.381779 1.97622  
 C -2.059442 0.220603 1.212333  
 C -2.045087 -0.662761 0.10789  
 H -0.767257 -2.137584 0.959814  
 H -0.230181 -0.425441 2.152066  
 H -0.826766 1.238465 2.636804  
 H -1.108527 -2.395498 -0.746651  
 H -2.847682 0.968329 1.251095  
 H 0.499433 -0.9667 -1.482

C 1.687592 -1.714868 0.163404  
 H 1.636806 -1.718756 1.261837  
 H 1.626324 -2.765643 -0.145407  
 C 1.888941 1.034815 0.562977  
 H 2.013282 0.76399 1.620918  
 C 3.036138 -1.110807 -0.286832  
 C 3.057769 0.444123 -0.255234  
 H 3.263661 -1.455652 -1.302882  
 H 3.827821 -1.515647 0.354747  
 H 2.987236 0.835899 -1.276758  
 H 4.010693 0.805049 0.149088  
 N -0.282105 1.343988 -0.600065  
 O -1.275406 0.730966 -1.188601  
 O -0.269558 2.591123 -0.507228  
 H 1.873019 2.125536 0.506846  
 C -3.283778 -0.925363 -0.696215  
 H -3.770303 -1.845414 -0.343206  
 H -3.999687 -0.103348 -0.612996  
 H -3.03204 -1.066288 -1.752052

**17:**

| <b>E(B3LYP)</b> | <b>H(B3LYP)</b> | <b>G(B3LYP)</b> | <b>E(M06-2X)</b> |
|-----------------|-----------------|-----------------|------------------|
| -634.474010     | -634.190333     | -634.245054     | -634.189267      |

C -0.688829 -1.354277 0.136074  
 C 0.702008 -0.883227 -0.340311  
 C 0.858465 0.583724 -0.035453  
 C -2.875594 -0.259421 1.974965  
 C -2.633425 0.241769 0.764203  
 C -1.795202 -0.37326 -0.340617  
 H -0.672865 -1.406811 1.228805  
 H -2.447676 -1.194897 2.326539  
 H -3.532947 0.255454 2.669938  
 H -0.887134 -2.366826 -0.234164  
 H -3.09979 1.179558 0.465619  
 H 0.758032 -1.032704 -1.430651  
 C 1.852294 -1.655911 0.324758  
 H 1.73202 -1.595281 1.415361  
 H 1.782551 -2.719571 0.066561  
 C 2.090762 1.110129 0.635117  
 H 2.049184 0.905285 1.716177  
 C 3.234526 -1.107741 -0.077024  
 C 3.342162 0.444154 0.023184  
 H 3.452723 -1.41937 -1.105961  
 H 3.996499 -1.583865 0.550736

H 3.494991 0.864842 -0.977219  
H 4.220239 0.729581 0.613075  
N -0.117903 1.38694 -0.360426  
O -1.185917 0.722632 -1.097403  
O -0.261597 2.607811 -0.204746  
H 2.127346 2.197143 0.524972  
C -2.712624 -1.017784 -1.389659  
H -3.251748 -1.858549 -0.942185  
H -3.442407 -0.292859 -1.76257  
H -2.12084 -1.382193 -2.236274

**18:**

| <b>E(B3LYP)</b> | <b>H(B3LYP)</b> | <b>G(B3LYP)</b> | <b>E(M06-2X)</b> |
|-----------------|-----------------|-----------------|------------------|
| -1126.512375    | -1126.134693    | -1126.213798    | -1126.041988     |

C 1.485691 -0.212803 -1.756537  
C 0.656606 0.772303 -0.366307  
C 0.681134 0.086458 0.882515  
C 2.360638 -2.090464 0.184972  
H 2.66032 -2.693491 1.03795  
H 1.247679 0.4049 -2.621328  
H -0.311729 0.683849 -0.854393  
C 1.206806 2.201548 -0.388324  
H 1.593892 2.447028 -1.383391  
H 0.350262 2.87145 -0.223661  
C 1.435198 0.557729 2.104917  
H 2.391378 0.026826 2.192266  
C 2.255446 2.483964 0.692633  
C 1.716375 2.068926 2.06453  
H 2.515678 3.549257 0.67991  
H 3.181321 1.930152 0.479067  
H 0.791873 2.625005 2.271764  
H 2.426587 2.326525 2.858909  
N -0.272538 -0.937699 1.059962  
O -0.857346 -1.388715 0.0257  
O -0.510436 -1.392248 2.189002  
H 0.854432 0.288837 2.990686  
C 3.27861 -1.316247 -0.470342  
C 2.859262 -0.409507 -1.502357  
H 1.352477 -2.250313 -0.171353  
H 0.814802 -1.062365 -1.652963  
C 4.731953 -1.338898 -0.041413  
H 5.386838 -1.638071 -0.869238  
H 5.078397 -0.354098 0.296782  
H 4.887228 -2.048549 0.775564

C 3.882225 0.443742 -2.206908  
H 4.478064 1.047397 -1.509955  
H 4.597869 -0.184695 -2.755076  
H 3.412865 1.11822 -2.927304  
H -2.618847 -1.823885 0.469267  
O -3.595704 -1.844004 0.384673  
C -3.929435 -1.114628 -0.759112  
H -4.937506 -1.404417 -1.075219  
H -3.244893 -1.2869 -1.602032  
C -3.964149 0.389248 -0.515055  
F -4.853983 0.736468 0.430739  
F -2.757542 0.875199 -0.125046  
F -4.303087 1.03975 -1.656832

**19:**

| <b>E(B3LYP)</b> | <b>H(B3LYP)</b> | <b>G(B3LYP)</b> | <b>E(M06-2X)</b> |
|-----------------|-----------------|-----------------|------------------|
| -1126.522139    | -1126.144722    | -1126.221368    | -1126.053039     |

C -2.060385 1.917277 -0.541557  
C -2.443434 0.067526 -1.132319  
C -2.064938 -0.868165 -0.144322  
C -1.289816 1.295224 2.180017  
C -0.370998 1.753636 1.298032  
C -0.736334 2.046229 -0.086624  
H -2.868058 1.993 0.179648  
H -2.342467 1.189875 1.947541  
H -0.997235 1.017828 3.188221  
H -2.286553 2.401316 -1.488941  
H -1.741238 0.146393 -1.95686  
C -3.915493 0.108519 -1.526459  
H -4.185533 1.102721 -1.899666  
H -4.039764 -0.576273 -2.378816  
C -3.006568 -1.644854 0.739315  
H -3.037826 -1.206531 1.746715  
C -4.856631 -0.328424 -0.396801  
C -4.427243 -1.694413 0.151769  
H -5.885913 -0.368382 -0.772331  
H -4.848612 0.417275 0.412014  
H -4.460838 -2.429234 -0.664391  
H -5.127652 -2.043777 0.918761  
N -0.701641 -1.066131 0.012149  
O 0.081227 -0.343143 -0.668487  
O -0.266855 -1.919458 0.835052  
H -2.603857 -2.653596 0.875155  
H 1.538007 -1.547394 1.041879

O 2.503054 -1.378295 1.114346  
C 3.054725 -1.547118 -0.164001  
H 2.295727 -1.529425 -0.9538  
H 3.624219 -2.485886 -0.246252  
C 4.030846 -0.424236 -0.462591  
F 3.428911 0.79188 -0.495526  
F 5.021597 -0.348715 0.445115  
F 4.601499 -0.615955 -1.676892  
C 1.072915 1.895294 1.723932  
H 1.163885 1.791861 2.808556  
H 1.697564 1.124256 1.261402  
H 1.484658 2.871527 1.443468  
C 0.31124 2.557771 -1.037845  
H 0.524886 3.615875 -0.82408  
H 1.251964 2.010064 -0.95562  
H -0.038661 2.498121 -2.072483

**20:**

**E(B3LYP)**

-1126.517088

**H(B3LYP)**

-1126.139786

**G(B3LYP)**

-1126.219538

**E(M06-2X)**

-1126.044559

C -2.825583 1.044565 0.643526  
C -2.779646 -0.423584 -0.6449  
C -1.660038 -1.249525 -0.390206  
C -1.612536 1.766118 0.725556  
H -3.081908 0.456881 1.523056  
H -3.677509 1.557273 0.205992  
H -2.651075 0.249985 -1.486665  
C -4.153626 -1.075686 -0.545749  
H -4.91987 -0.321269 -0.33421  
H -4.392418 -1.478122 -1.541501  
C -1.702326 -2.579641 0.307661  
H -1.418775 -2.453305 1.365797  
C -4.207709 -2.215654 0.480219  
C -3.09084 -3.231216 0.210799  
H -5.189913 -2.700913 0.437657  
H -4.102924 -1.811093 1.497462  
H -3.22694 -3.651492 -0.79512  
H -3.152019 -4.070128 0.913214  
N -0.427466 -0.673533 -0.599564  
O -0.395748 0.529005 -1.005632  
O 0.63385 -1.294867 -0.301739  
H -0.930756 -3.228956 -0.118137  
C -1.416077 3.01637 -0.01336  
C -0.414558 3.85935 0.309995

H -0.284897 4.798978 -0.218861  
H 0.304365 3.64554 1.092149  
C -0.615582 1.340576 1.771641  
H 0.420721 1.469409 1.451678  
H -0.774303 1.918823 2.693533  
H -0.763317 0.286875 2.029556  
C -2.366877 3.361299 -1.13836  
H -2.369184 2.575407 -1.902058  
H -3.399184 3.489497 -0.788855  
H -2.064701 4.29377 -1.622383  
H 1.843168 0.162014 -0.155293  
O 2.479187 0.743567 0.316491  
C 3.437875 -0.089772 0.90907  
H 3.004451 -1.006731 1.33155  
H 3.933686 0.462844 1.714057  
C 4.516716 -0.513669 -0.077977  
F 3.998943 -1.193302 -1.121874  
F 5.195198 0.539237 -0.574502  
F 5.416091 -1.324756 0.534583

**21:**

| <b>E(B3LYP)</b> | <b>H(B3LYP)</b> | <b>G(B3LYP)</b> | <b>E(M06-2X)</b> |
|-----------------|-----------------|-----------------|------------------|
| -1126.595088    | -1126.213021    | -1126.29023     | -1126.141535     |

C 3.611884 0.593899 -0.199999  
C 2.195634 1.177892 -0.418526  
C 1.135403 0.463294 0.476937  
C 1.781556 -0.58039 1.406137  
C 2.720583 -1.508906 0.656283  
C 3.62752 -0.922325 -0.146078  
H 4.027205 1.002643 0.736089  
H 2.337027 -0.007246 2.163834  
H 1.005441 -1.133866 1.937862  
H 4.263648 0.961275 -1.001288  
H 1.918247 0.979429 -1.457354  
C 2.170239 2.704969 -0.229922  
H 2.528 2.962799 0.777562  
H 2.885327 3.156311 -0.928924  
C 0.253801 1.457036 1.272408  
H 0.893455 1.838297 2.07747  
C 0.769342 3.286283 -0.465007  
C -0.302513 2.629579 0.448232  
H 0.499549 3.12629 -1.515135  
H 0.790778 4.371201 -0.311831  
H -1.149359 2.282703 -0.150032

H -0.710963 3.363697 1.152431  
N 0.126674 -0.291131 -0.43978  
O -0.161649 0.191249 -1.526137  
O -0.409168 -1.309676 0.0117  
H -0.561343 0.907521 1.755069  
H -1.998703 -1.625037 -1.12409  
O -2.918426 -1.831534 -1.379073  
C -3.718471 -1.687415 -0.240366  
H -3.30353 -2.179087 0.651845  
H -4.694993 -2.133838 -0.452236  
C -3.96196 -0.229441 0.126403  
F -4.755506 -0.143684 1.219741  
F -4.548457 0.462069 -0.863711  
F -2.797922 0.408969 0.42698  
C 4.666157 -1.618501 -0.984513  
H 4.639305 -2.706461 -0.890878  
H 4.538533 -1.370394 -2.047497  
H 5.676146 -1.284626 -0.707868  
C 2.539238 -2.983354 0.89688  
H 3.2393 -3.600946 0.329695  
H 2.670964 -3.224135 1.961369  
H 1.519703 -3.290823 0.63013

**22:**

| <b>E(B3LYP)</b> | <b>H(B3LYP)</b> | <b>G(B3LYP)</b> | <b>E(M06-2X)</b> |
|-----------------|-----------------|-----------------|------------------|
| -1126.529413    | -1126.150991    | -1126.224902    | -1126.064095     |

C -1.904966 1.89059 -0.727242  
C -2.567043 0.448584 -0.85043  
C -2.123245 -0.535427 0.189118  
C -1.49398 1.173773 1.92551  
C -0.384393 1.641726 1.255345  
C -0.529157 1.911292 -0.131456  
H -2.573542 2.508862 -0.116382  
H -2.506904 1.417169 1.634016  
H -1.390736 0.732437 2.913497  
H -1.89125 2.334221 -1.726737  
H -2.216652 0.075388 -1.821976  
C -4.101169 0.529721 -0.854447  
H -4.436929 0.96747 0.096618  
H -4.435832 1.218128 -1.639848  
C -3.126829 -1.419876 0.869942  
H -3.685245 -0.85629 1.630039  
C -4.760275 -0.8519 -1.048408  
C -4.114492 -1.973176 -0.182418



H -4.699267 -1.129903 -2.107548  
 H -5.828589 -0.761391 -0.820326  
 H -3.567607 -2.670661 -0.827161  
 H -4.888271 -2.562212 0.322919  
 N -0.821896 -0.905398 0.100709  
 O -0.090292 -0.162518 -0.661682  
 O -0.297752 -1.819241 0.810766  
 H -2.602356 -2.226981 1.385265  
 H 1.47348 -1.584196 0.924503  
 O 2.44771 -1.44121 0.976091  
 C 2.945436 -1.458143 -0.333904  
 H 3.37907 -2.433934 -0.605525  
 H 2.181229 -1.200513 -1.076504  
 C 4.061883 -0.440447 -0.466894  
 F 3.635459 0.828724 -0.239895  
 F 4.569708 -0.468714 -1.723094  
 F 5.075374 -0.672787 0.38686  
 C 0.591392 2.464205 -0.95942  
 H 0.581789 3.563461 -0.90614  
 H 1.569157 2.114858 -0.625642  
 H 0.462388 2.186441 -2.009681  
 C 0.978826 1.617848 1.912157  
 H 1.46909 2.595603 1.832701  
 H 0.885281 1.384336 2.976532  
 H 1.640839 0.871616 1.461451

**23:**

| <b>H(B3LYP)</b> | <b>H(B3LYP)</b> | <b>G(B3LYP)</b> | <b>E(M06-2X)</b> |
|-----------------|-----------------|-----------------|------------------|
| -1126.565415    | -1126.185033    | -1126.261462    | -1126.109336     |

C 1.990909 1.553121 0.701591  
 C 2.569463 0.132047 0.849017  
 C 2.155059 -0.681117 -0.348994  
 C 0.607342 3.589137 -0.976441  
 C 0.035138 2.397044 -0.772351  
 C 0.466263 1.515545 0.406097  
 H 2.517216 2.048648 -0.119149  
 H 1.425662 3.966503 -0.36899  
 H 0.255665 4.249705 -1.764146  
 H 2.184813 2.132446 1.611445  
 H 2.141868 -0.328214 1.754578  
 C 4.102585 0.118855 0.957218  
 H 4.517896 0.675546 0.106016  
 H 4.413136 0.659922 1.858703  
 C 3.144754 -1.510708 -1.106322

H 3.740442 -0.862849 -1.767209  
 C 4.679362 -1.309805 0.977116  
 C 4.071076 -2.243807 -0.111964  
 H 4.50586 -1.750103 1.966509  
 H 5.767135 -1.247989 0.8606  
 H 3.48966 -3.0384 0.36935  
 H 4.865574 -2.744865 -0.675125  
 N 0.905613 -0.628491 -0.708457  
 O 0.055047 0.115426 0.16582  
 O 0.313323 -1.2073 -1.6586  
 H 2.614658 -2.215413 -1.751842  
 H -1.543302 -1.216864 -1.488171  
 O -2.513886 -1.300459 -1.383464  
 C -2.778999 -1.665221 -0.057434  
 H -3.15945 -2.695734 0.015185  
 H -1.902138 -1.578089 0.594647  
 C -3.855572 -0.769779 0.531872  
 F -4.132865 -1.156362 1.801346  
 F -5.001679 -0.816116 -0.168746  
 F -3.475575 0.532964 0.589713  
 C -0.358541 1.854841 1.656568  
 H -0.202441 2.904149 1.92244  
 H -1.423192 1.690468 1.473315  
 H -0.050429 1.223502 2.497393  
 C -1.103963 1.905525 -1.631031  
 H -1.44101 2.699231 -2.30415  
 H -0.795496 1.04604 -2.236098  
 H -1.955483 1.562 -1.036619

**24:**

**E(UB3LYP)**  
-468.671390

**H(UB3LYP)**  
-468.375468

**G(UB3LYP)**  
-468.426827

**E(UM06-2X)**  
-468.439619

C -0.325934 1.377929 -0.021072  
 C 0.670197 0.552845 0.834249  
 C 0.60104 -0.877601 0.377975  
 C -1.901483 -0.57087 0.104621  
 C -1.695771 0.733962 -0.159038  
 H 0.095432 1.557295 -1.023298  
 H -0.442822 2.377071 0.427347  
 H 0.28609 0.602664 1.86621  
 C 2.098077 1.137938 0.826085  
 H 2.049693 2.231957 0.910243  
 H 2.627629 0.780523 1.720204  
 C 2.912192 0.726996 -0.409556

H 3.925402 1.14336 -0.341598  
C -0.755835 -1.497295 0.517436  
H -0.819427 -2.42362 -0.073704  
H -0.937976 -1.813457 1.562471  
C 2.968385 -0.801347 -0.534121  
H 3.576766 -1.098102 -1.397672  
H 3.459493 -1.215597 0.357904  
H 2.463247 1.150866 -1.319814  
C 1.555234 -1.393515 -0.660595  
H 1.594688 -2.492085 -0.623439  
H 1.169819 -1.156034 -1.673548  
C -3.233602 -1.277471 0.034869  
H -4.079187 -0.610531 -0.145093  
H -3.232991 -2.039631 -0.757722  
H -3.429405 -1.812399 0.974988  
C -2.761684 1.701923 -0.617002  
H -3.72397 1.23202 -0.829831  
H -2.929273 2.486301 0.135047  
H -2.438098 2.218432 -1.531799

**25:**

| <b>E(UB3LYP)</b> | <b>H(UB3LYP)</b> | <b>G(UB3LYP)</b> | <b>E(UM06-2X)</b> |
|------------------|------------------|------------------|-------------------|
| -468.667279      | -468.372727      | -468.424189      | -468.4339259      |

C -0.609132 -1.426668 0.292198  
C 0.611267 -0.746428 -0.358995  
C 0.648013 0.704294 0.014488  
C -1.905022 0.676198 -0.104787  
C -1.904114 -0.652415 0.11493  
H -0.415221 -1.576649 1.367129  
H -0.729954 -2.436462 -0.128663  
H 0.453353 -0.822769 -1.45341  
C 1.941458 -1.447479 -0.044331  
H 2.043267 -1.588882 1.042324  
H 1.951151 -2.449218 -0.492586  
C 3.107087 -0.602679 -0.570271  
H 2.940438 -0.415633 -1.640633  
C -0.617565 1.487414 -0.14073  
H -0.676796 2.267815 0.6383  
H -0.602906 2.065607 -1.08864  
C 3.224957 0.739591 0.18289  
H 3.865638 0.603794 1.062907  
H 3.740961 1.465226 -0.456845  
H 4.054263 -1.151236 -0.497442  
C 1.857154 1.325753 0.647902

H 1.84185 2.412147 0.482  
H 1.788051 1.218036 1.74788  
C -3.137513 1.524569 -0.309232  
H -3.224435 2.285286 0.480141  
H -3.071323 2.074384 -1.25881  
H -4.068494 0.954963 -0.323996  
C -3.137875 -1.515955 0.229781  
H -4.075474 -0.956848 0.21379  
H -3.173743 -2.255641 -0.582888  
H -3.112916 -2.091086 1.16639

**26:**

| <b>E(UB3LYP)</b> | <b>H(UB3LYP)</b> | <b>G(UB3LYP)</b> | <b>E(UM06-2X)</b> |
|------------------|------------------|------------------|-------------------|
| -468.674942      | -468.379343      | -468.4313        | -468.441878       |

C 0.618765 -1.443728 -0.203179  
C -0.625356 -0.724262 0.344851  
C -0.6454 0.715638 -0.079557  
C 1.922652 0.674352 0.005596  
C 1.916175 -0.669086 -0.066693  
H 0.456147 -1.681016 -1.267607  
H 0.720758 -2.416579 0.299373  
H -0.548774 -0.749802 1.453115  
C -1.920268 -1.471445 -0.035459  
H -1.914902 -1.65793 -1.119583  
H -1.930822 -2.455403 0.451762  
C -3.18284 -0.676992 0.320462  
C -3.171197 0.690426 -0.375006  
H -3.23728 -0.53467 1.410423  
H -4.078115 -1.243828 0.034283  
C 0.640608 1.484181 -0.048203  
H 0.686957 2.167211 -0.916836  
H 0.634579 2.1786 0.818554  
H -4.077098 1.258973 -0.12971  
H -3.177566 0.538257 -1.46353  
C -1.923127 1.498379 0.019705  
H -2.054172 1.849134 1.064401  
H -1.853806 2.415701 -0.583014  
C 3.156695 1.536321 0.126902  
H 3.226454 2.236178 -0.718297  
H 3.108157 2.155219 1.034265  
H 4.088939 0.969896 0.164716  
C 3.143042 -1.549221 -0.064782  
H 4.085494 -0.99838 -0.077793  
H 3.149907 -2.204693 0.817882

H 3.136654 -2.214241 -0.94021

**27:**

**E(UB3LYP)**  
-592.361708

**H(UB3LYP)**  
-591.94094

**G(UB3LYP)**  
-592.018387

**E(UM06-2X)**  
-592.037165

C 3.135437 0.743424 -0.862459  
C 1.589704 0.843839 -0.821712  
C 1.093027 0.255308 0.478899  
C 2.957333 -1.47313 0.293475  
C 3.697531 -0.59023 -0.403307  
H 3.581723 1.545039 -0.252715  
H 3.476438 0.942503 -1.890411  
H 1.216591 0.212049 -1.643513  
C 1.093181 2.28559 -1.056275  
H 1.620156 2.722506 -1.915358  
H 0.029279 2.250718 -1.32847  
C 1.24984 3.183612 0.181115  
H 0.834954 4.177943 -0.028354  
C 1.506809 -1.181257 0.673058  
H 1.34457 -1.485466 1.718194  
H 0.861027 -1.850905 0.075796  
C 0.554733 2.56368 1.40096  
H 0.682522 3.20338 2.28336  
H -0.525586 2.507209 1.206533  
H 2.314899 3.336409 0.406856  
C 1.091022 1.152558 1.694347  
H 0.509141 0.683346 2.500594  
H 2.121645 1.239364 2.088864  
C 3.425998 -2.829455 0.763105  
H 4.421697 -3.100597 0.406491  
H 3.436592 -2.88108 1.861383  
H 2.729861 -3.610511 0.425462  
C 5.141701 -0.791047 -0.799715  
H 5.59471 -1.691028 -0.379163  
H 5.243563 -0.843328 -1.893283  
H 5.748927 0.066169 -0.475649  
Sn -2.376247 -0.362668 -0.117645  
C -2.571783 -1.910597 -1.615337  
H -2.07729 -2.833074 -1.29417  
H -3.628521 -2.136413 -1.79682  
H -2.123949 -1.596996 -2.563893  
C -3.317442 -1.045518 1.705434  
H -4.377549 -1.26215 1.532985  
H -2.839631 -1.958575 2.075267

H -3.249569 -0.284685 2.48985  
C -3.426429 1.394694 -0.814332  
H -4.480486 1.164013 -1.00432  
H -3.383599 2.198263 -0.071724  
H -2.988281 1.769109 -1.745408  
H -0.605476 0.041353 0.190339

**28:**

| <b>E(UB3LYP)</b> | <b>H(UB3LYP)</b> | <b>G(UB3LYP)</b> | <b>E(UM06-2X)</b> |
|------------------|------------------|------------------|-------------------|
| -592.364984      | -591.944607      | -592.022379      | -592.041961       |

C 2.136917 -0.242807 1.369377  
C 2.153625 1.040891 0.524671  
C 1.382184 0.855376 -0.759989  
C 2.155086 -1.589243 -0.742727  
C 2.325335 -1.532299 0.591837  
H 1.185983 -0.300548 1.923198  
H 2.915938 -0.173954 2.143574  
H 3.210038 1.227193 0.237907  
C 1.683937 2.265993 1.331847  
H 0.700227 2.04752 1.772599  
H 2.370618 2.435688 2.171932  
C 1.572227 3.525648 0.462756  
C 0.62168 3.287463 -0.718939  
H 2.567934 3.800696 0.082982  
H 1.224285 4.372764 1.067808  
C 1.755516 -0.369067 -1.552446  
H 0.924791 -0.641583 -2.224912  
H 2.58816 -0.119866 -2.241935  
H 0.551343 4.186216 -1.344614  
H -0.388581 3.092683 -0.332841  
C 1.081175 2.093562 -1.570282  
H 1.994652 2.386285 -2.12415  
H 0.332881 1.86343 -2.342999  
C 2.34173 -2.823553 -1.593781  
H 1.395922 -3.115399 -2.072695  
H 3.048906 -2.620994 -2.410825  
H 2.716631 -3.688151 -1.042844  
C 2.693107 -2.704623 1.471339  
H 2.708735 -3.663262 0.949198  
H 3.681944 -2.554603 1.92823  
H 1.981219 -2.794035 2.304246  
H -0.219609 0.389625 -0.251138  
Sn -1.910283 -0.273249 0.066964  
C -1.981942 -1.253062 1.992816

H -1.755256 -0.550071 2.801128  
H -2.979146 -1.668787 2.175099  
H -1.257818 -2.072777 2.040274  
C -3.378417 1.314991 0.058591  
H -4.382806 0.909784 0.2248  
H -3.172214 2.044184 0.849015  
H -3.379991 1.843922 -0.900035  
C -2.445631 -1.712181 -1.45595  
H -2.465574 -1.246657 -2.446782  
H -1.726105 -2.537065 -1.481137  
H -3.438129 -2.132283 -1.257994

**29:**

| <b>E(B3LYP)</b> | <b>H(B3LYP)</b> | <b>G(B3LYP)</b> | <b>E(M06-2X)</b> |
|-----------------|-----------------|-----------------|------------------|
| -469.332131     | -469.022119     | -469.071739     | -469.102613      |

C -0.212697 1.360858 0.142732  
C 0.727227 0.468225 0.972486  
C 0.617611 -1.00852 0.539493  
C -1.880192 -0.507521 0.10638  
C -1.593603 0.788579 -0.11674  
H 0.244667 1.608538 -0.82778  
H -0.319635 2.330194 0.653559  
H 0.391149 0.528713 2.018273  
C 2.192585 0.948311 0.914852  
H 2.248904 2.016185 1.167249  
H 2.763853 0.416575 1.689744  
C 2.855907 0.69189 -0.449443  
H 3.917609 0.966545 -0.401252  
C -0.841371 -1.479421 0.639778  
H -0.952813 -2.442483 0.118304  
H -1.08216 -1.698347 1.693314  
C 2.707092 -0.773959 -0.885621  
H 3.128861 -0.916637 -1.888964  
H 3.293833 -1.412207 -0.207758  
H 2.408369 1.342847 -1.213034  
C 1.239638 -1.231768 -0.852443  
H 1.172922 -2.296173 -1.115412  
H 0.661847 -0.690026 -1.613938  
C -3.234001 -1.145073 -0.099418  
H -4.020797 -0.437975 -0.369328  
H -3.18957 -1.91386 -0.884093  
H -3.555061 -1.660821 0.816941  
C -2.562817 1.813387 -0.657922  
H -3.526854 1.39769 -0.957057

H -2.753143 2.602165 0.084132  
H -2.134353 2.316619 -1.536475  
H 1.21009 -1.60747 1.248772

**30:**

| <b>E(B3LYP)</b> | <b>H(B3LYP)</b> | <b>G(B3LYP)</b> | <b>E(M06-2X)</b> |
|-----------------|-----------------|-----------------|------------------|
| -469.336341     | -469.026684     | -469.076801     | -469.105419      |

C -0.633693 1.469393 -0.093474  
C 0.624505 0.698004 0.324562  
C 0.624441 -0.697977 -0.324422  
C -1.924562 -0.671496 0.046068  
C -1.924532 0.671452 -0.046106  
H -0.497086 1.861945 -1.115865  
H -0.741723 2.363141 0.540111  
H 0.587469 0.550798 1.41707  
C 1.908433 1.47788 -0.006413  
H 1.914574 1.709651 -1.082802  
H 1.903137 2.44388 0.516949  
C 3.177551 0.68755 0.342224  
C 3.177547 -0.687573 -0.342353  
H 3.233789 0.549098 1.432237  
H 4.069917 1.258408 0.054662  
C -0.633677 -1.469347 0.093887  
H -0.741562 -2.363408 -0.539275  
H -0.497066 -1.861381 1.116477  
H 4.069882 -1.258463 -0.054765  
H 3.233816 -0.549097 -1.432357  
C 1.908412 -1.477908 0.006257  
H 1.91468 -1.709912 1.082591  
H 1.903039 -2.443795 -0.517316  
C -3.159189 -1.537783 0.128481  
H -3.241713 -2.186806 -0.755303  
H -3.096017 -2.209364 0.996568  
H -4.090618 -0.975269 0.217277  
C -3.159142 1.537783 -0.128723  
H -4.090406 0.975333 -0.21967  
H -3.242915 2.18533 0.756032  
H -3.094878 2.21079 -0.995611  
H 0.58712 -0.550741 -1.416935

**31:**

| <b>E(UB3LYP)</b> | <b>H(UB3LYP)</b> | <b>G(UB3LYP)</b> | <b>E(UM06-2X)</b> |
|------------------|------------------|------------------|-------------------|
| -429.355778      | -429.090792      | -429.140728      | -429.1410989      |



C 0.279989 -1.454009 -0.177794  
 C -0.927771 -0.716384 0.41658  
 C -0.928905 0.722994 0.006539  
 C 1.603282 0.67376 0.014717  
 C 1.58199 -0.671439 -0.061263  
 H 0.087822 -1.671741 -1.241212  
 H 0.401254 -2.43338 0.306851  
 H -0.847146 -0.795945 1.51969  
 C -2.327816 -1.207249 -0.015983  
 C 0.33076 1.511158 -0.024683  
 H 0.361335 2.159422 -0.920296  
 H 0.364412 2.234006 0.816978  
 C -3.222103 0.041496 0.132806  
 C -2.311298 1.220346 -0.2945  
 H -2.563993 2.156275 0.228957  
 H -2.434528 1.444296 -1.370135  
 C 2.850222 1.519382 0.120605  
 H 3.777165 0.943487 0.128035  
 H 2.907952 2.231765 -0.714948  
 H 2.828879 2.124431 1.038307  
 C 2.805217 -1.557579 -0.078053  
 H 3.75101 -1.013418 -0.108984  
 H 2.823418 -2.210944 0.806018  
 H 2.779256 -2.225019 -0.951279  
 H -3.511639 0.164343 1.18439  
 H -4.145841 -0.021776 -0.452317  
 H -2.687173 -2.063427 0.565943  
 H -2.293585 -1.517228 -1.069822

**32:**

| <b>E(UB3LYP)</b> | <b>H(UB3LYP)</b> | <b>G(UB3LYP)</b> | <b>E(UM06-2X)</b> |
|------------------|------------------|------------------|-------------------|
| -553.042317      | -552.651794      | -552.728506      | -552.735030       |

C 3.074451 0.948982 -0.82973  
 C 1.541423 1.076194 -0.687701  
 C 1.090763 0.459541 0.617013  
 C 2.964592 -1.260111 0.352484  
 C 3.632486 -0.413131 -0.453616  
 H 3.571314 1.716778 -0.214841  
 H 3.359001 1.1833 -1.866643  
 H 1.084934 0.562842 -1.547161  
 C 1.062474 2.53792 -0.576503  
 H 1.616599 3.222034 -1.230217  
 H 0.005147 2.596869 -0.864201

C 1.221497 2.880459 0.922148  
 C 1.598999 -0.919118 0.942718  
 H 1.639013 -1.061195 2.033979  
 H 0.886744 -1.687896 0.590061  
 C 0.956275 1.546661 1.67095  
 C 3.449266 -2.627877 0.772292  
 H 4.386198 -2.928343 0.299736  
 H 3.594167 -2.673951 1.861339  
 H 2.696597 -3.391484 0.529718  
 C 4.996001 -0.677207 -1.049125  
 H 5.464273 -1.597894 -0.696  
 H 4.93902 -0.728561 -2.145955  
 H 5.680125 0.151271 -0.816077  
 H -0.521536 0.141594 0.260811  
 H 1.660389 1.397991 2.502502  
 H -0.047116 1.537426 2.12531  
 H 2.243562 3.22389 1.122353  
 H 0.550331 3.685647 1.239469  
 Sn -2.280988 -0.282631 -0.1155  
 C -2.398248 -2.101195 -1.280449  
 H -1.96662 -2.946073 -0.734003  
 H -3.441975 -2.342665 -1.510752  
 H -1.857232 -1.995931 -2.226412  
 C -3.393788 -0.568944 1.716905  
 H -4.441597 -0.802296 1.497237  
 H -2.977573 -1.394365 2.303601  
 H -3.369222 0.333982 2.335674  
 C -3.21867 1.308903 -1.241142  
 H -4.259739 1.054931 -1.469831  
 H -3.214824 2.2459 -0.67464  
 H -2.69573 1.481286 -2.187525

**33:**

**E(UB3LYP)**  
-553.043562

**H(UB3LYP)**  
-552.65336

**G(UB3LYP)**  
-552.728523

**E(UM06-2X)**  
-552.738780

C 2.078203 0.07003 1.428202  
 C 2.091869 1.337237 0.573961  
 C 1.372964 1.123453 -0.730084  
 C 2.263366 -1.240622 -0.719563  
 C 2.364009 -1.193987 0.625337  
 H 1.100276 -0.034237 1.923961  
 H 2.81333 0.149768 2.242367  
 H 3.152468 1.568743 0.343804  
 C 1.437525 2.615476 1.124755

C 1.22037 3.477692 -0.142031  
 C 1.833425 -0.037843 -1.552833  
 H 1.04872 -0.354208 -2.259719  
 H 2.680808 0.266523 -2.199964  
 C 0.966462 2.465049 -1.300103  
 H 1.552374 2.723911 -2.196004  
 H -0.086345 2.46827 -1.620526  
 C 2.559331 -2.455291 -1.568963  
 H 1.654364 -2.797194 -2.091609  
 H 3.288653 -2.203617 -2.352061  
 H 2.960146 -3.301902 -1.008721  
 C 2.751622 -2.362984 1.501859  
 H 2.837267 -3.31141 0.968287  
 H 3.710973 -2.172257 2.004159  
 H 2.009469 -2.50003 2.30111  
 H -0.145575 0.513712 -0.244775  
 Sn -1.814122 -0.238957 0.031055  
 C -1.859621 -1.305749 1.91154  
 H -1.648519 -0.636421 2.752001  
 H -2.846971 -1.752157 2.074023  
 H -1.11703 -2.110227 1.921069  
 C -3.363687 1.271113 0.076199  
 H -4.344533 0.809339 0.236175  
 H -3.189923 1.987308 0.886006  
 H -3.398958 1.826233 -0.866832  
 C -2.268581 -1.63965 -1.553346  
 H -2.308963 -1.135976 -2.524687  
 H -1.506984 -2.424453 -1.607652  
 H -3.238533 -2.118438 -1.378154  
 H 2.042193 3.124218 1.883989  
 H 0.473303 2.363528 1.586277  
 H 2.127423 4.058315 -0.350064  
 H 0.40314 4.196988 -0.024779

**34:**

**E(B3LYP)**  
-430.009836

**H(B3LYP)**  
-429.730165

**G(B3LYP)**  
-429.778834

**E(M06-2X)**  
-429.798781

C -0.044829 1.352331 -0.175534  
 C -1.053572 0.443264 -0.899862  
 C -0.924521 -1.016694 -0.426672  
 C 1.591899 -0.545709 -0.080667  
 C 1.342328 0.772038 0.033345  
 H -0.444475 1.645633 0.809294  
 H 0.041788 2.298772 -0.729791

H -0.883853 0.518829 -1.981683  
C -2.508207 0.7893 -0.523905  
C 0.512661 -1.545874 -0.45566  
H 0.595726 -2.4237 0.204052  
H 0.741035 -1.931675 -1.4626  
C -2.772357 0.032567 0.813822  
C -1.615814 -0.997512 0.954872  
H -1.969708 -1.992036 1.248782  
H -0.90184 -0.676732 1.72316  
C 2.943569 -1.192858 0.112098  
H 3.756578 -0.483412 0.276964  
H 2.925607 -1.886221 0.965249  
H 3.206825 -1.797111 -0.767821  
C 2.36409 1.819657 0.409114  
H 3.338517 1.412049 0.684573  
H 2.518584 2.527868 -0.41771  
H 2.004249 2.41613 1.259692
